# Supplementary material
Source: ML conference proceedings conference paper supplement (https://openreview.net/forum?id=nlFVmB4EOu)

# Meta-Llama-3.1-8B-Instruct Aggregated Hidden Density and Distance Trajectories

Aggregated Pattern Density ( $\rho_d$ ) vs. Layer Index (Across All Tasks)

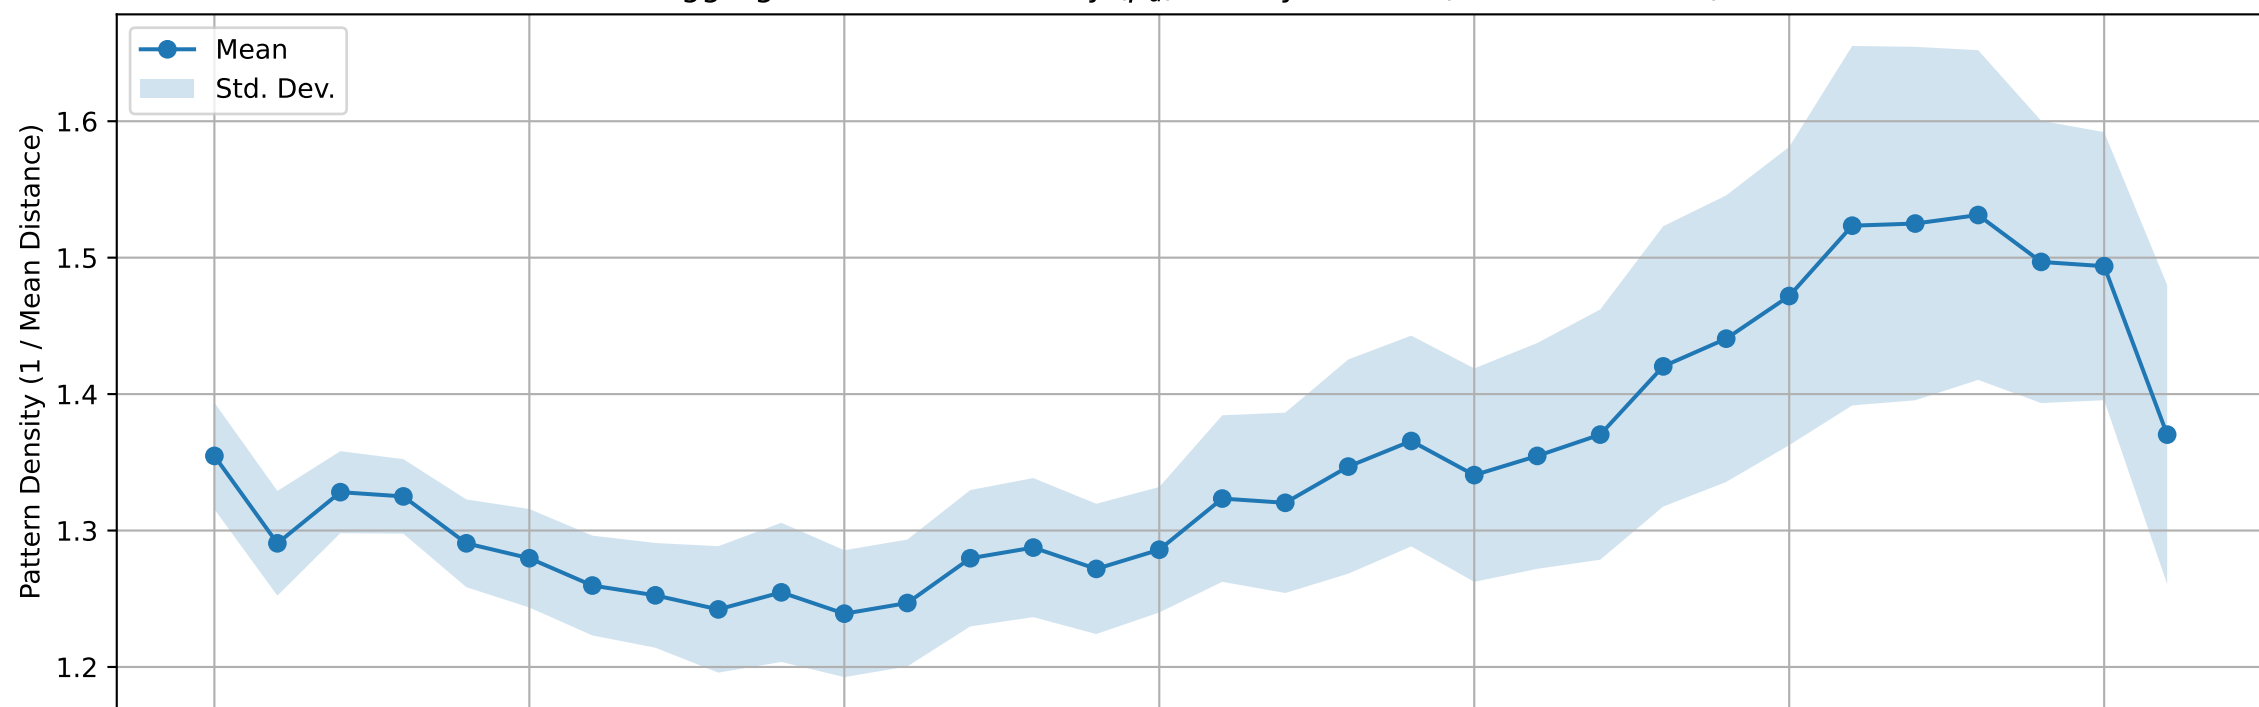

Aggregated Representational Mismatch ( $d_r$ ) vs. Layer Index (Across All Tasks)

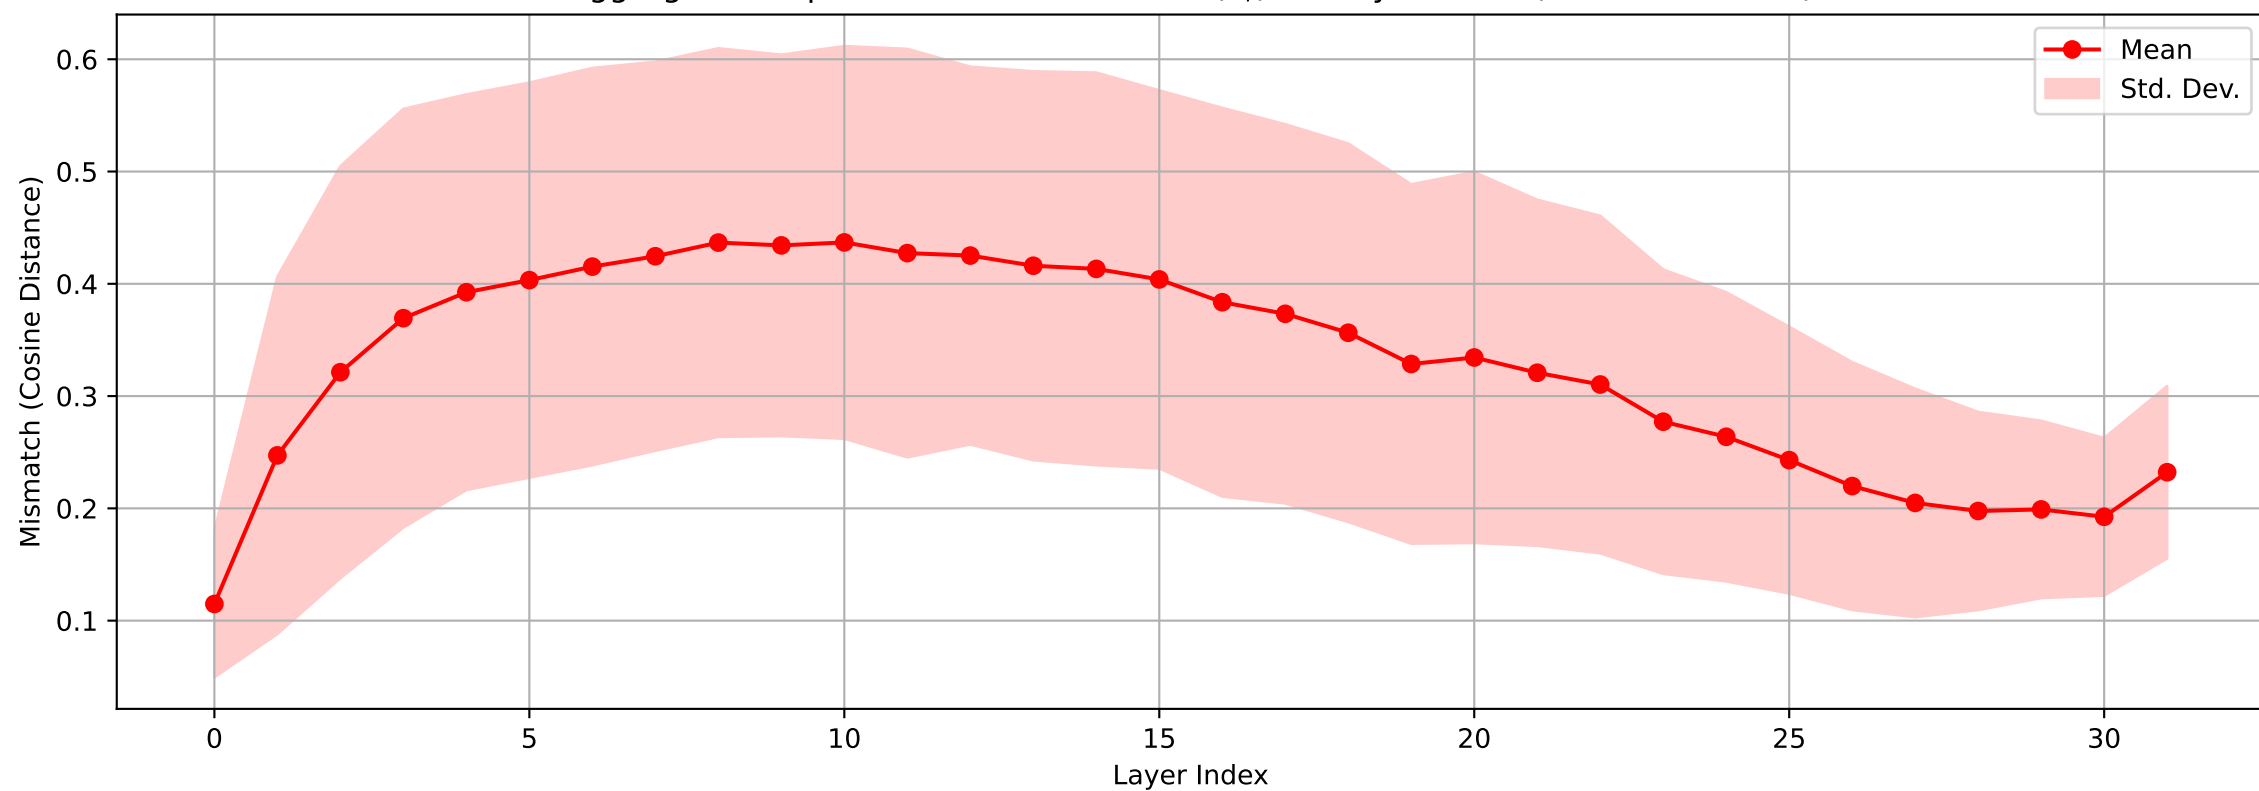

Supplement: supplementary_material [file agg.pdf › output/meta-llama_Meta-Llama-3.1-8B-Instruct/agg.pdf]
