# Supplementary material
Source: ML conference proceedings conference paper supplement (https://openreview.net/forum?id=nlFVmB4EOu)

# Phi-4 Aggregated Hidden Density and Distance Trajectories

Aggregated Pattern Density ( $\rho_d$ ) vs. Layer Index (Across All Tasks)

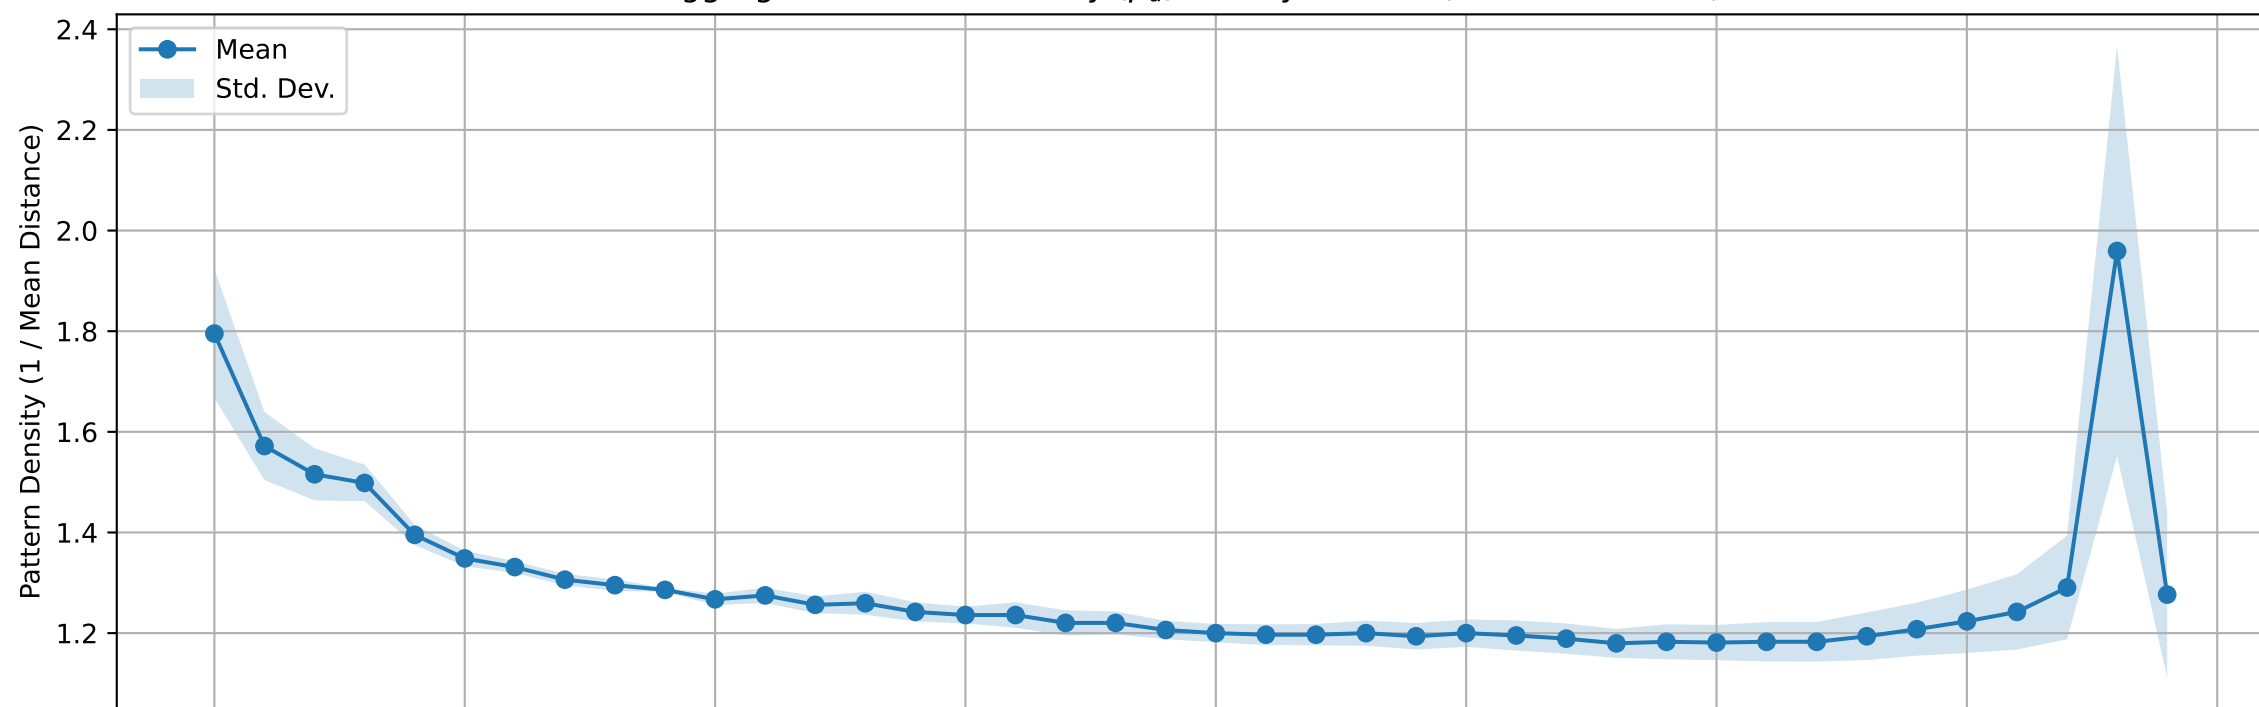

Aggregated Representational Mismatch ( $d_r$ ) vs. Layer Index (Across All Tasks)

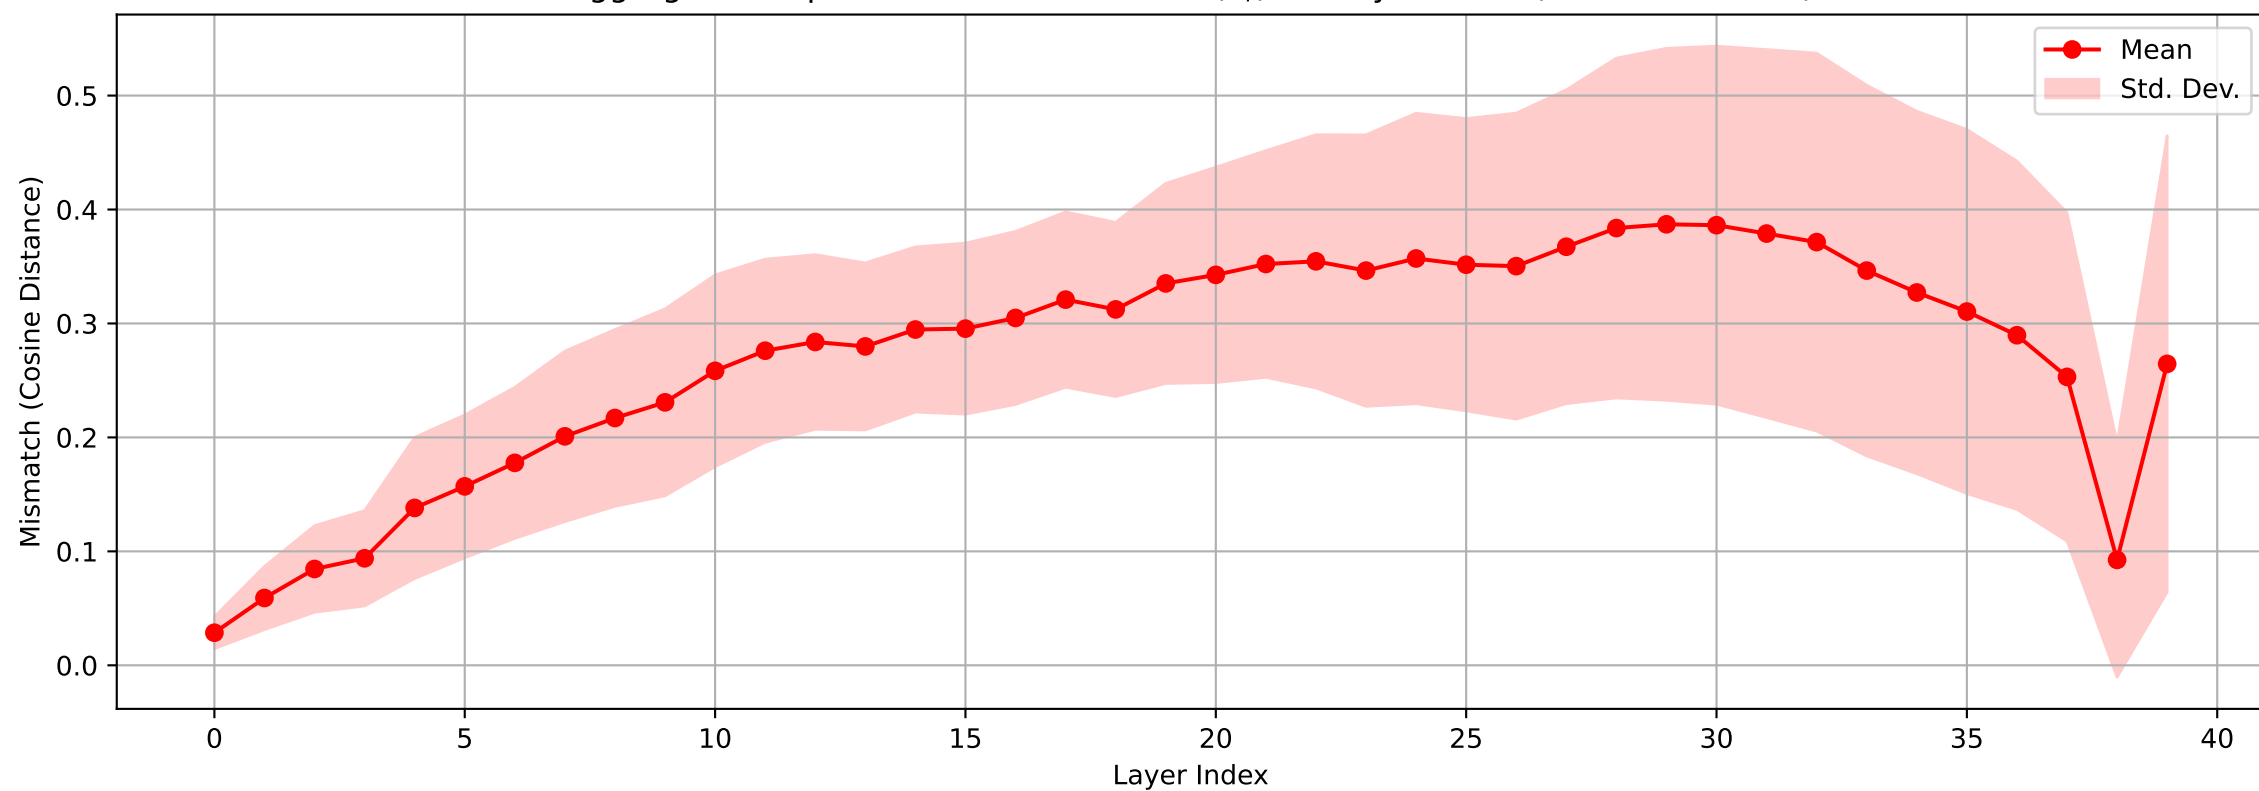

Supplement: supplementary_material [file agg.pdf › output/unsloth_Phi-4/agg.pdf]
