# Supplementary material
Source: ML conference proceedings conference paper supplement (https://openreview.net/forum?id=nlFVmB4EOu)

# gemma-3-4b-it Overlaid Hidden Density and Distance Trajectories

Overlaid Pattern Density ( $\rho_d$ ) vs. Layer Index

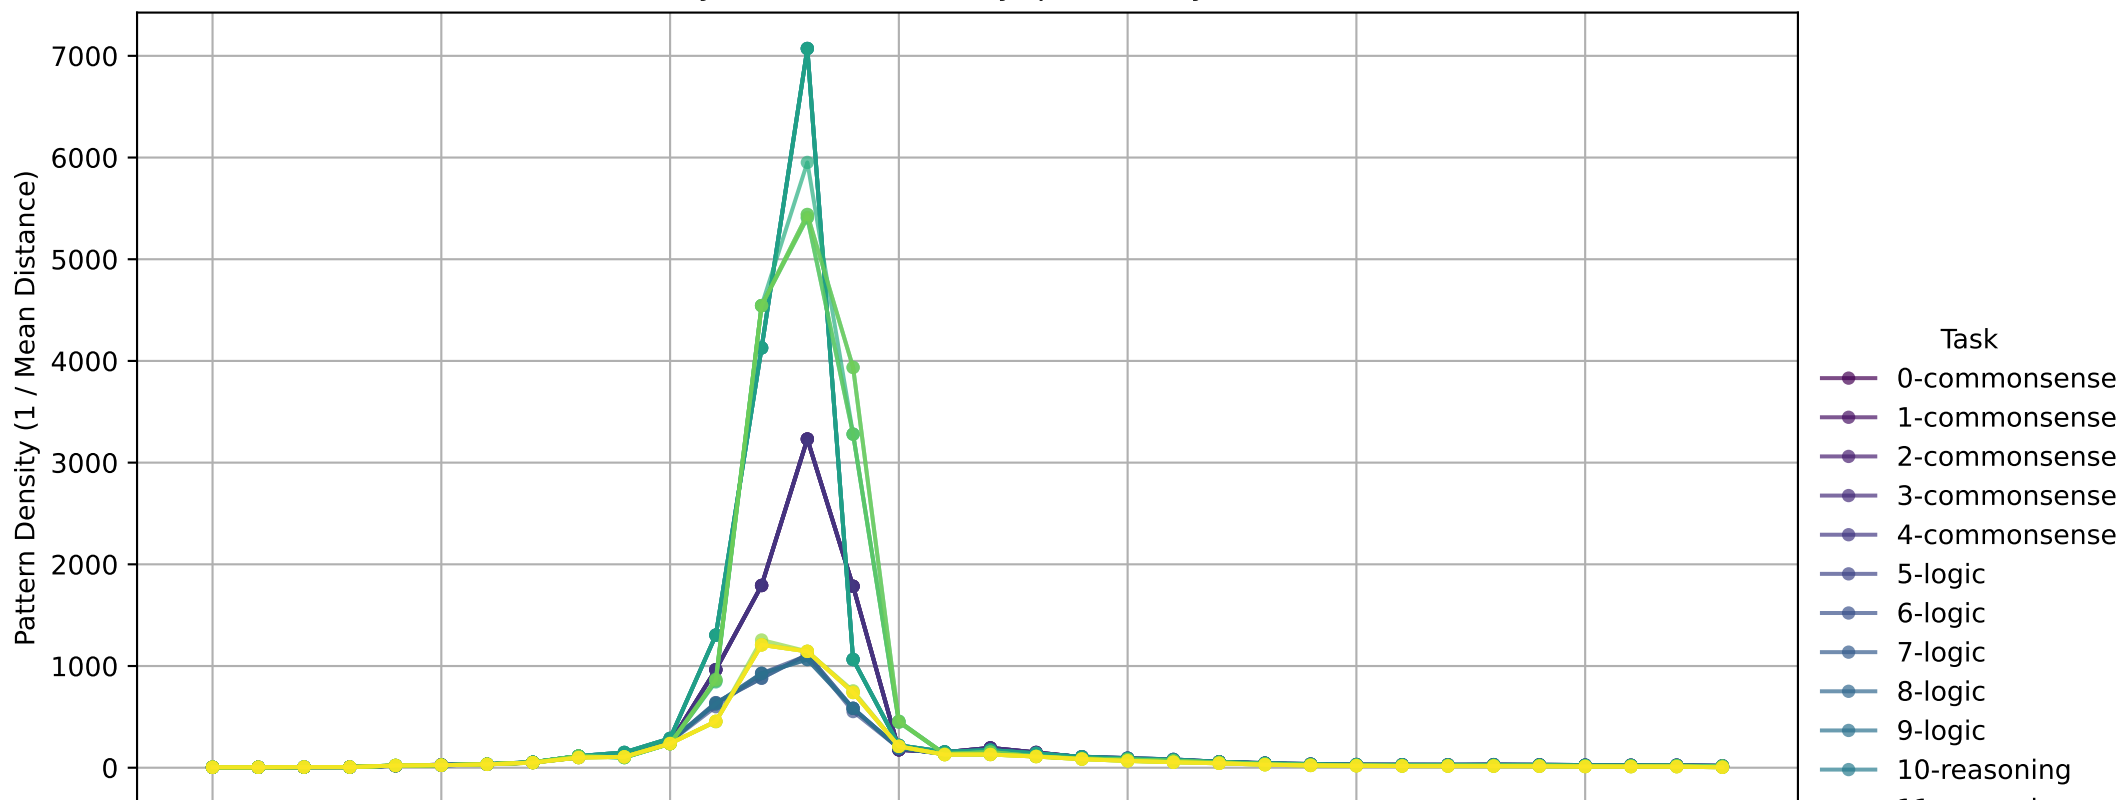

Overlaid Representational Mismatch ( $d_r$ ) vs. Layer Index

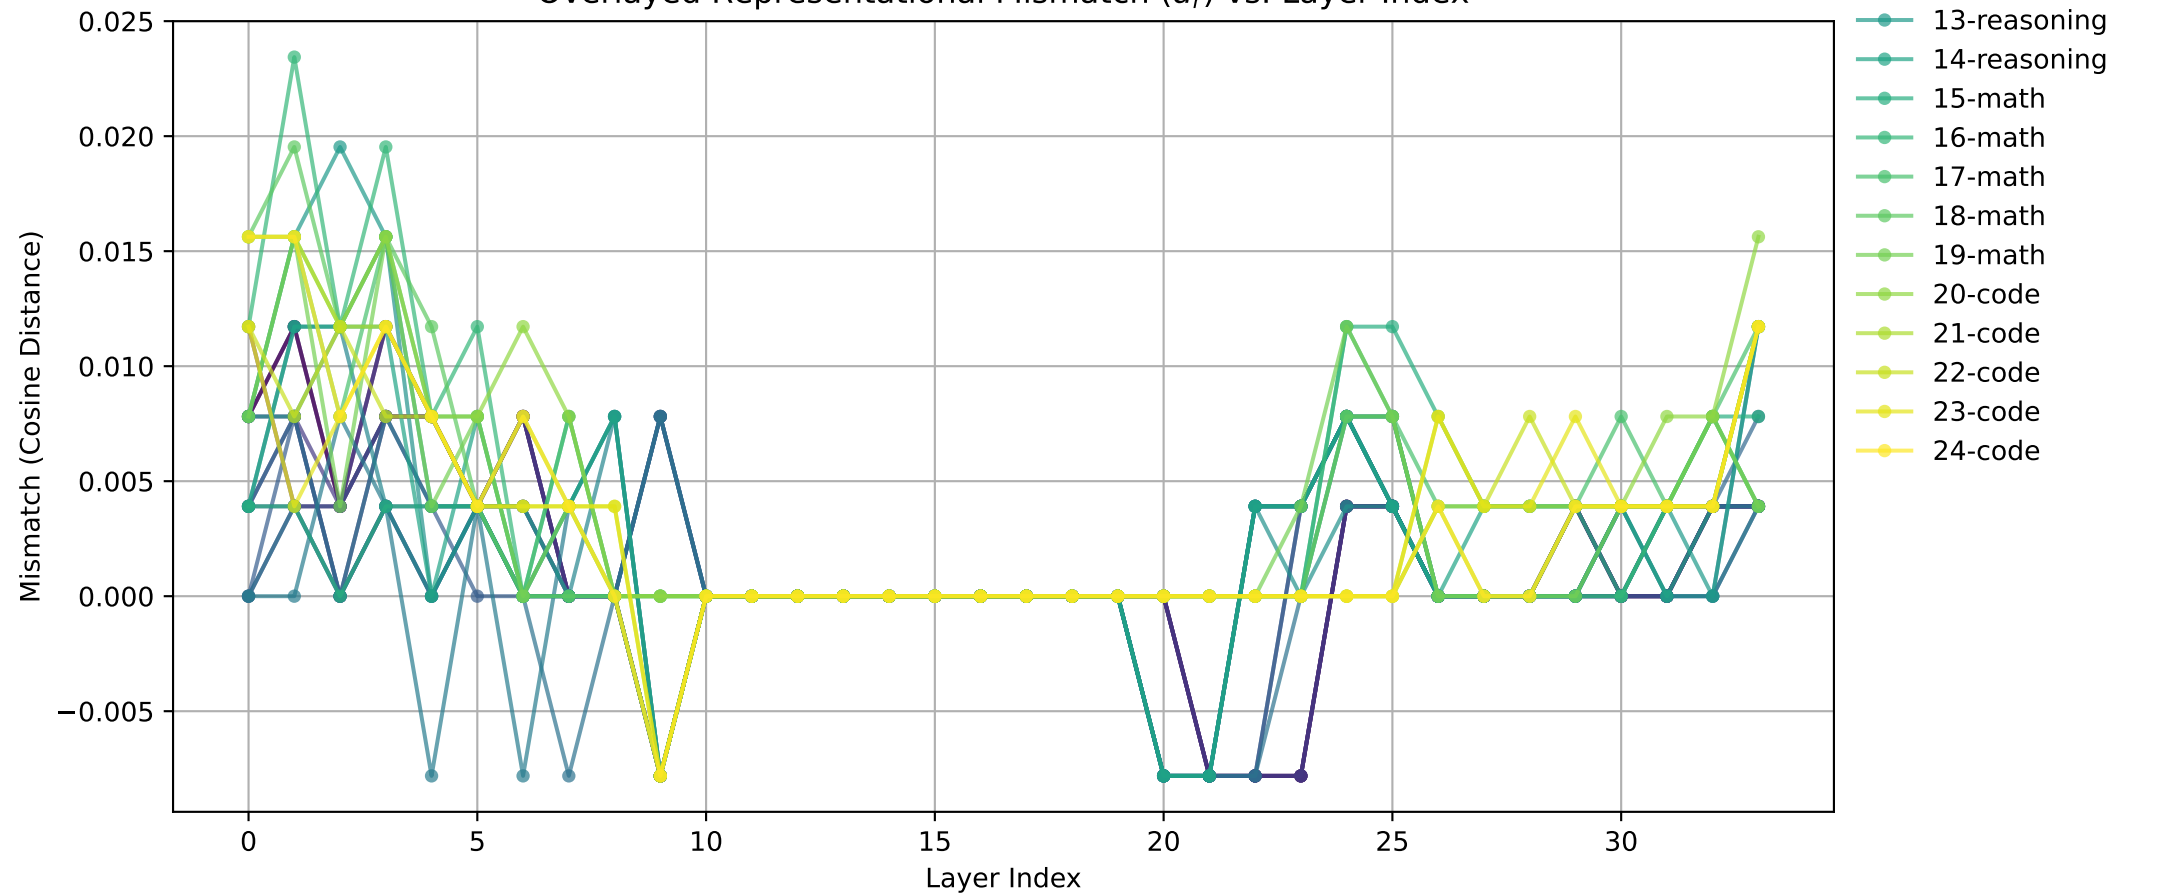

Supplement: supplementary_material [file overlay.pdf › output/unsloth_gemma-3-4b-it/overlay.pdf]
