# Supplementary material
Source: ML conference proceedings conference paper supplement (https://openreview.net/forum?id=nlFVmB4EOu)

# Meta-Llama-3.1-8B-Instruct Aggregated and Overlaid Layer-wise Score ( $S^{(\ell)}$ )

Aggregated

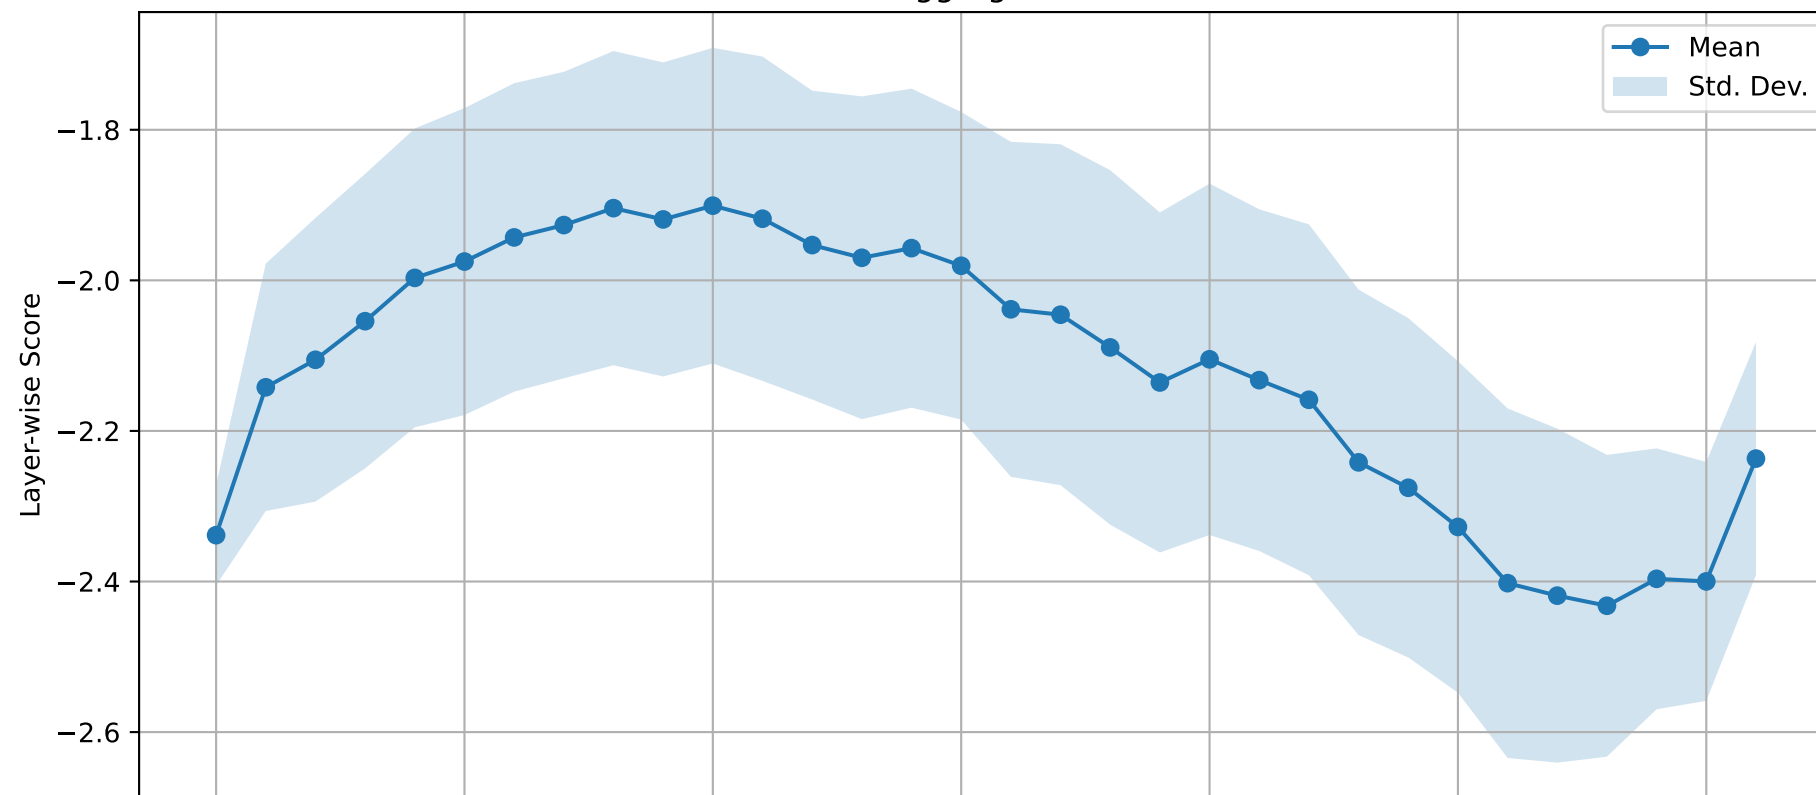

Overlaid

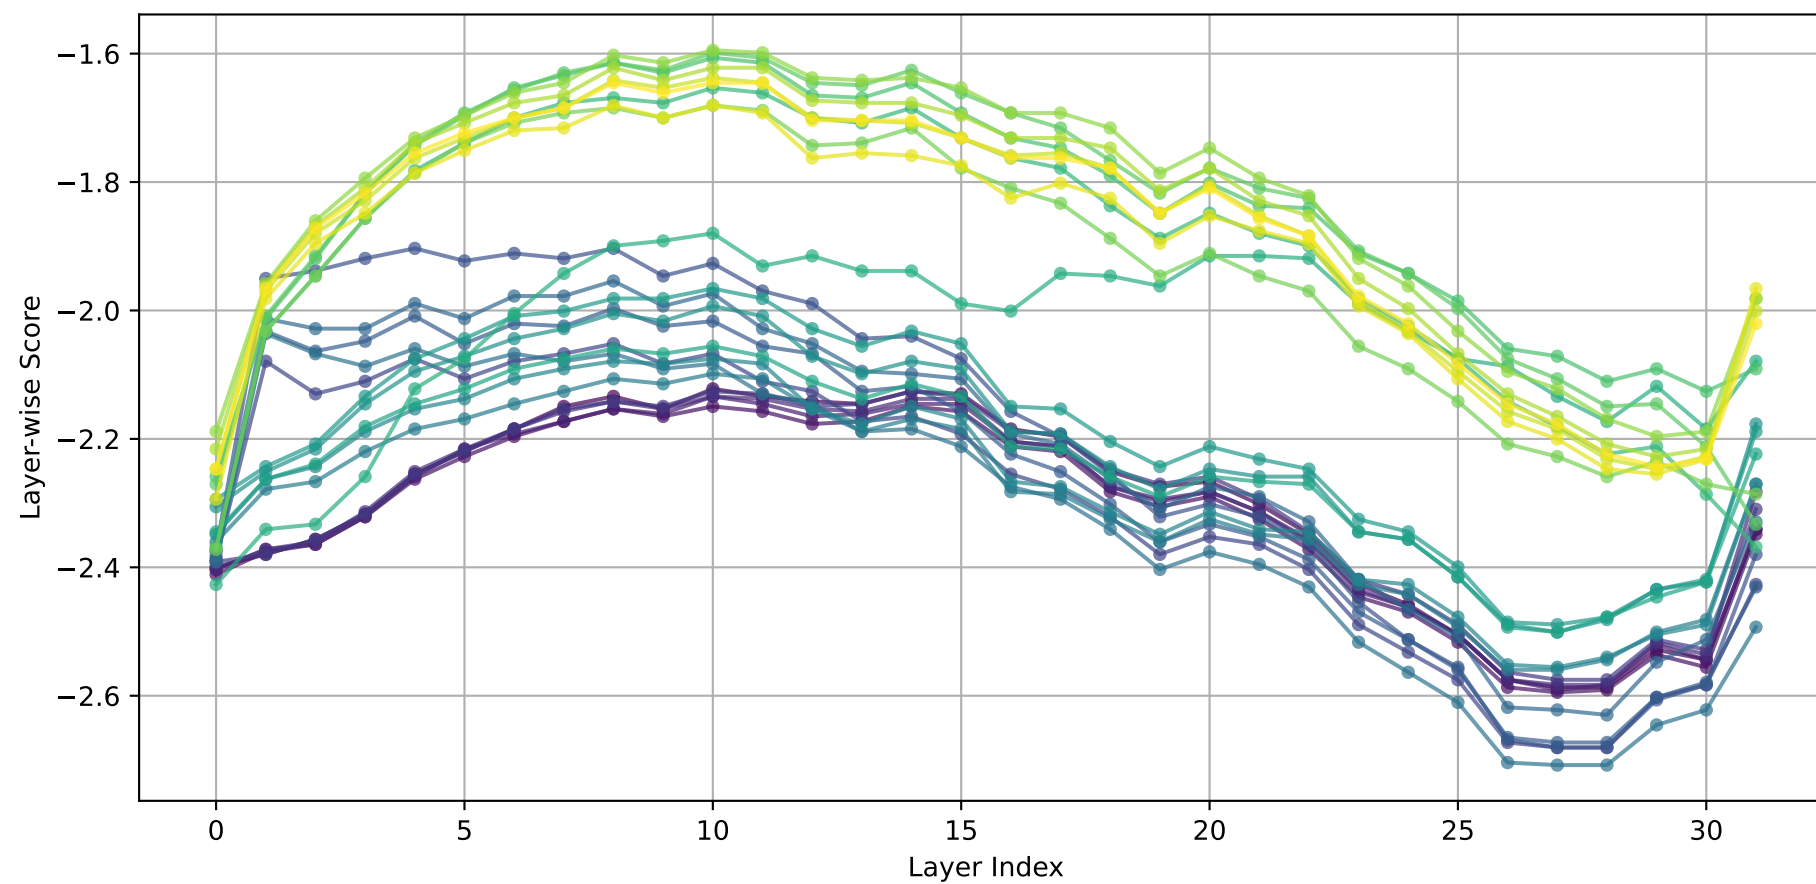

Supplement: supplementary_material [file score.pdf › output/score.pdf]
